# Supplementary material
Source: Elsevier journal article supplement (https://www.sciencedirect.com/science/article/pii/S2173574314000288)
Supplement: mmc1 [file S2173574314000288:mmc1.docx]

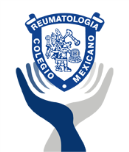
**ACTUALIZACIÓN DE LA GUÍA MEXICANA PARA EL TRATAMIENTO FARMACOLÓGICO DE LA ARTRITIS REUMATOIDE**

**COLEGIO MEXICANO DE REUMATOLOGÍA**

**ANALGÉSICOS Y ANTIINFLAMATORIOS**

| 1. **AINE** | Antiinflamatorios no esteroideos que inhiben la ciclooxigenasa 1 y 2 (COX-1 y COX-2), que regula la producción de mediadores celulares (prostaglandinas y tromboxanos) que intervienen en diferentes procesos inflamatorios. Algunos fármacos son inhibidores selectivos de la COX-2, mientras otros actúan sobre ambas formas de la enzima. |
| --- | --- |
| Línea de tratamiento en la que está indicado | En pacientes con AR generan una disminución en dolor y rigidez matutina. **[NE: 1, GR: A]**1  También se puede utilizar en caso de una recaída y ante la persistencia de síntomas incontrolados aislados a pesar de existir buena respuesta objetiva a un FARME. Se usarán en función del tiempo necesario para que el FARME alcance niveles terapéuticos eficaces. **[NE: IV, GR: D]**2  La elección del AINE o COX-2 debe ser individualizada debido a su distinto perfil de seguridad. **[NE: 1, GR: A]**1,2,3 |
| Estudios que se requieren antes del tratamiento y durante el seguimiento | BH, PFH y PFR, en especial en pacientes con hepatopatía y nefropatía. |
| Monoterapia o en combinaciones (¿cuál es la mejor combinación y secuencia?) | No existe evidencia de que combinaciones de AINE sean más eficaces que la monoterapia, al contrario, sólo potencian las reacciones adversas de grupo. **[NE: 1, GR: A]**2  El agregar paracetamol al uso de naproxeno demostró mejoría en el control del dolor. **[NE: 1, GR: A]**1  100 mg de diclofenaco no mostraron un beneficio mayor al uso de 50 mg diclofenaco y paracetamol o codeína. **[NE: 1, GR: A]**1  150 mg de indometacina no mostraron un beneficio mayor al uso de 50 mg de indometacina y paracetamol. **[NE: 1, GR: A]**1  El uso concomitante de MTX y AINE es seguro con el monitoreo apropiado, pero el uso de ácido acetilsalicílico a dosis antiinflamatoria debe evitarse. **[NE: 1, GR: A]**4  Pacientes con riesgo de desarrollar úlceras gastroduodenales asociadas a AINE deben de recibir gastroprotección a base de un inhibidor de bomba de protones (IBP). **[NE: II, GR: A]** 3  La evidencia de costo-efectividad no es concluyente, pero los inhibidores selectivos COX-2 pueden ser costo-efectivos en pacientes con riesgo elevado de eventos gastrointestinales. **[NE: II, GR: A]**1 |
| Tiempo para definir ajuste de dosis y retiro del medicamento | Cualquier AINE debe utilizarse a dosis plenas durante al menos una semana antes de considerar que existe un fracaso terapéutico. Una vez controlados los síntomas, el AINE debe utilizarse a la dosis mínima eficaz y durante el menor tiempo necesario, ya que los eventos adversos son dependientes de la dosis y duración del tratamiento.1,2,3  Nivel de evidencia: **I**  Grado de recomendación: **A**  Se deben administrar por 1 a 2 semanas, con períodos de descanso de 5 a 7 días teniendo control estrecho sobre las PFH, renal y tiempos de coagulación.  Cuando el AINE se suspende tras haber sido utilizado durante un tiempo prolongado (> 3 meses), esta suspensión debe ser gradual para evitar efectos de rebote del dolor. No existe un esquema que haya demostrado su eficacia frente a otros para esta reducción. **[NE: IV, GR: D]**2 |
| Dosis mínima y máxima | Naproxeno (250 a 500 mg/12 h). Dosis máxima 1,259 mg/24 h  Diclofenaco (100 mg/24 h). Dosis máxima 150 mg/24 h  Ketoprofeno (150-200 mg/24 h). Dosis máxima 300 mg/24 h  Meloxicam (15 mg/24 h). Dosis máxima 15 mg/24h  Piroxicam (20 mg/24 h). Dosis máxima 20 mg/24h  Celecoxib (100 a 200 mg/24 h). Dosis máxima 400mg/24h  Etoricoxib (60 a 90 mg/24 h). Dosis máxima 120 mg/24h  Lumiracoxib (100 mg/24 h). Dosis máxima 400 mg/24h |
| Contraindicaciones | Los pacientes con una historia previa de enfermedad gastrointestinal tienen un menor riesgo de complicaciones con los inhibidores selectivos COX-2 comparado con un AINE no selectivo. **[NE: I, GR: A]**2,3,4  Los factores de riesgo definitivos para úlceras gastroduodenales asociados a AINE son edad avanzada, historia previa de úlcera, dosis altas de AINE, uso combinado AINE o de manera concomitante con glucocorticoides y la presencia de comorbilidades.3 |
| Casos especiales | En los pacientes ancianos se monitorizará la función renal y hepática y se adaptarán los intervalos de las dosis de los fármacos que se eliminan por estas vías. **[NE: IV, GR: D]**2  Se recomienda evitar en lo posible el uso de AINE durante el embarazo y la lactancia. En el último trimestre se ha observado cierre precoz del conducto arterioso y al tener efecto antiagregante e inhibidor de la musculatura uterina, los AINE no son recomendables en fechas cercanas al parto. Todos los AINE pasan, en mayor o menor medida, a la leche materna. Por estos motivos los AINE se deben evitar en el primer y último trimestre del embarazo y durante la lactancia. Si son necesarios, se usarán AINE de vida media corta (ibuprofeno o ketoprofeno). **[NE: IV, GR: D]**2  No existen estudios que específicamente comparen la eficacia y seguridad de terapias contra dolor en pacientes con y sin comorbilidades cardiovasculares o condiciones renales. Por lo que se recomienda que los AINE sean utilizados cautelosamente en la población general con AR y utilizar las guías actuales del uso de AINE y opioides en insuficiencia renal moderada a grave. **[NE: I, GR: A]** 5  Se sugiere valoración estricta y vigilancia estrecha en pacientes que están recibiendo un AINE y anticoagulantes. |

| 1. **Glucocorticoides** | Antiinflamatorios e inmunosupresores que ejercen su acción a través de su unión con receptores específicos intracelulares, por lo que inhiben la síntesis, liberación y acción de citocinas y otros mediadores que participan en la respuesta inflamatoria; e incrementan la transcripción de genes antiinflamatorios. |
| --- | --- |
| Línea de tratamiento en la que está indicado | Se utilizan en cualquier fase de la enfermedad y como terapia “puente” en la fase inicial, a la espera del efecto terapéutico de los FARME o durante una recaída, así como para el control de síntomas en caso de no existir otra opción, pero debido a sus efectos secundarios, su uso deberá ser durante el menor tiempo posible, según permita la actividad de la enfermedad. **[NE: IV, GR: D]** 2,6  Estos medicamentos de ninguna manera sustituyen a los FARME y sólo se considera su uso sin FARME en la AR del anciano, seronegativa, no erosiva o similar al síndrome de sinovitis simétrica recidivante con edema con fóvea. **[NE: I, GR: A]**2  Algunos pacientes requieren utilizar dosis muy bajas (< 5 mg) por periodos de tiempo prolongados. |
| Estudios que se requieren antes del tratamiento y durante el seguimiento | Se recomienda gastroprotección con un inhibidor de la bomba de protones en pacientes con tratamiento combinado de AINE y glucocorticoides. **[NE: I, GR: A]**6  En caso de utilizar el glucocorticoide ≥ 10 mg/día por > tres meses, se recomienda vigilancia para prevención o diagnóstico de osteoporosis y la suplementación con calcio y vitamina D. **[NE: I, GR: A]**3  Se debe realizar evaluación con densitometría ósea para determinar el uso de fármacos antirresortivos como bifosfonatos según las guías de manejo de osteoporosis en pacientes con esteroides y, en caso de no ser posible, manejando los factores de riesgo para osteoporosis. **[NE: I, GR: A]**2,6,5  Se sugiere la valoración oftalmológica durante el uso de glucocorticoides para valoración de efectos adversos.  Se demuestra que no existe intolerancia a la glucosa en pacientes con AR activa al recibir dosis altas de prednisolona, pero debido a diferencias individuales se recomienda su monitorización. **[NE: I, GR: A]**8 |
| Monoterapia o en combinaciones (¿cuál es la mejor combinación y secuencia?) | Existe evidencia de su acción como modificador de la enfermedad en AR de reciente comienzo, a dosis bajas y siempre en combinación con FARME. **[NE: I, GR: A]**2,6  Además como terapia “puente” en la fase inicial, a la espera del efecto terapéutico de los FARME o durante una recaída, así como para el control de síntomas en caso de no existir otra opción, pero debido a sus efectos secundarios su uso deberá reducirse a la menor dosis posible, y ser administrado por un corto periodo de tiempo, según como permita la actividad de la enfermedad. **[NE: IV, GR: D]**2,6 |
| Dosis mínima y máxima | La dosis inicial se debe individualizar con base en la actividad de la enfermedad, factores metabólicos (DM) y pacientes con factores de riesgo para infecciones u osteoporosis. **[NE: I, GR: A]**9  La mayoría de los estudios en AR sugieren el uso de dosis bajas por vía oral (≤ 10 mg/día de prednisona o sus equivalentes). No existen estudios comparativos de su uso preferente a dosis más altas al inicio del tratamiento. **[NE: I, GR: A]**6  Siempre que sea posible se dejara una dosis única diaria durante la mañana y la dosis se reduce de manera progresiva (pasando las dosis fraccionadas a toma única antes de la disminución de la dosis) hasta la suspensión del medicamento. **[NE: I, GR: A]**2  Dos estudios reportaron el beneficio de terapia con prednisona a dosis altas en AR de reciente comienzo: COBRA (*Combination therapy in Rheumatoid Arthritis*) y BeSt (*Behandel-Stratieen*), utilizaron 60 mg de prednisona en combinación con otros FARME tradicionales y con una reducción a 7.5 mg a la semana seis y suspendiendo el medicamento en la semana 12, presentando una inhibición sustancial de la progresión del daño radiográfico y se mantuvo durante años. **[NE: I, GR: A]**9  La vía intramuscular o intraarticular permite un mayor control sobre la dosis total acumulada y se prefiere en ciertas circunstancias. Poner en qué circunstancias. **[NE: I, GR: A]**6  Con este procedimiento, complicaciones tales como la artritis séptica son inusuales. La aspiración del derrame sinovial al momento de la infiltración reduce recaídas. **[NE: I, GR: A]**3  La mayoría de los estudios en AR sugieren el uso de dosis bajas por vía oral (≤ 10 mg/día de prednisona o sus equivalentes). La evidencia no muestra superioridad de ningún preparado de glucocorticoides sobre otro, a dosis equivalentes. Los más utilizados son prednisona y prednisolona (corta acción), y  metilprednisolona y deflazacort (acción intermedia). |
| Contraindicaciones | En caso de utilizar el glucocorticoide ≥ 10 mg/día por > tres meses, se recomienda vigilancia para prevención o diagnóstico de osteoporosis y la suplementación con calcio y vitamina D. **[NE: I, GR: A]**3  Se reporta un incremento en la mortalidad en pacientes con AR y uso de glucocorticoides. Estudios controlados muestran un incremento de cataratas, infecciones, sangrado tubo digestivo, necrosis avascular y fracturas. **[NE: I, GR: A]**3 |

**FARME SINTETICOS**

| 1. **Metotrexate** | Agente farmacológico con acciones antiinflamatorias (mediadas por la modulación del metabolismo de la adenosina) e inmunosupresoras (debido a la inhibición de la enzima dihidrofolato reductasa, crucial para la síntesis de tetrahidrofolato activo, el cual es necesario para la síntesis de DNA y RNA por las células de rápida proliferación, como las del sistema inmunitario).4 |
| --- | --- |
| Línea de tratamiento en la que está indicado | El MTX es el fármaco modificador de la enfermedad que, por su eficacia para reducir los signos y síntomas, mejorar la capacidad funcional y reducir la progresión radiográfica, así como por su perfil de seguridad, debe ser usado como fármaco de primera elección en el tratamiento de la artritis reumatoide, a menos que esté contraindicado. **[NE: I, GR: A]**10  La evidencia está basada en una revisión sistemática de estudios aleatorizados controlados que apoyan el alto perfil de seguridad y eficacia clínica a largo plazo del MTX.11  En pacientes sin antecedente de tratamiento previo con algún inductor de remisión, el uso de MTX como monoterapia es recomendado. Esta estrategia es preferida a iniciar con terapia combinada con dos o más FARME. **[NE: I, GR: A]**12 |
| Estudios que se requieren antes del tratamiento y durante el seguimiento | Antes del inicio de MTX debería realizarse BH, PFH, PFR y radiografía del tórax. **[NE: II, GR: B]**13 Durante el seguimiento, se debe realizar BH, PFH y PFR cada 4 semanas hasta que se alcance una dosis estable de MTX y posteriormente cada 8 a 12 semanas.  Algunas guías recomiendan en pacientes con factores de riesgo de infección por virus de la hepatitis o VIH (antecedentes transfusionales, prácticas sexuales de riesgo, uso de drogas intravenosas), realizar pruebas de escrutinio para hepatitis B o C o para VIH. **[NE: II, GR: B]6**  Es importante descartar embarazo antes de iniciar MTX. En mujeres en edad gestacional y con vida sexual activa se debe realizar prueba de embarazo antes de iniciar tratamiento con MTX y debe informarse a la paciente sobre los riesgos potenciales de un embarazo. **11** |
| Monoterapia o en combinaciones (¿cuál es la mejor combinación y secuencia?) | El MTX es el FARME de anclaje para cualquier tipo de terapia combinada, a menos que esté contraindicado. **[NE: I, GR: A]**6  La terapia combinada de MTX con CLQ o HCQ y/o SSZ; o con LEF han probado ser eficaces en la reducción de los signos o síntomas de enfermedad activa en casos de respuesta inadecuada a la monoterapia. **[NE: I, GR: A]**6 |
| Tiempo para definir ajuste de dosis y retiro del medicamento | El tiempo recomendado para alcanzar la dosis máxima de MTX es a los tres meses de inicio del tratamiento. **[NE: I, GR: A]**2  En pacientes con aparente respuesta inadecuada a MTX por VO, debe considerarse el cambio a la administración parenteral (IM o SC) antes de dictaminar falla al tratamiento.1-3  Nivel de evidencia: **I**  Fuerza de recomendación: **A**  Barrera de implementación: Ninguna |
| Dosis mínima y máxima | La dosis de MTX debe ser individualizada. Se recomienda iniciar con una dosis de 10 a 15 mg/semana, con un rápido incremento a una dosis máxima de 25 mg/semana. La dosis debe ser ajustada en base a la función renal. **[NE: I, GR: A]**6  El grupo de trabajo recomienda utilizar una dosis semanal de MTX de 10 a 15 mg como inicio en pacientes con enfermedad activa, con incrementos en la dosis de 5 mg por semana, los cuales deben ser evaluados cada 6 a 8 semanas hasta llegar a 25 mg como dosis máxima en cuyo caso, si existe falla al tratamiento, se sugiere considerar la posibilidad de terapia combinada con dos FARME sintéticos o valorar, de acuerdo a las condiciones individuales, el uso concomitante con un FARME biológico. El panel además sugiere considerar en todos los pacientes el uso concomitante de ácido fólico con el objetivo de reducir los efectos secundarios. **GR: D** |
| Contraindicaciones | El MTX está contraindicado en caso de hipersensibilidad, embarazo y lactancia, hepatopatía alcohólica, hepatitis por virus B o C, insuficiencia hepática, síndromes de inmunodeficiencia, insuficiencia renal y citopenias.  La presencia de neumopatía crónica y la infección activa no asociada al síndrome de Felty son contraindicaciones relativas.2,3 |
| Casos especiales | Tanto en hombres, como en mujeres, el MTX debe ser suspendido al menos tres meses antes de considerar la concepción. **[NE: IV, GR: D]**10  Las mujeres que reciben MTX en edad gestacional y con vida sexual activa deben recibir un método anticonceptivo. **[NE: IV, GR: D]**10  El MTX puede ser continuado con seguridad en el periodo perioperatorio en pacientes con AR que van a ser sometidos a cirugía ortopédica electiva. **[NE: I, GR: A]**13  El uso perioperatorio de MTX en otros tipos de procedimientos quirúrgicos debe ser decidido con base en el contexto individual del caso. **[NE: IV, GR: D]**7  Debido a la posibilidad de una respuesta protectora insuficiente después del inicio del tratamiento con MTX, se recomienda la vacunación para influenza, neumococo y otras vacunas de virus inactivados antes del inicio del tratamiento con MTX. No hay contraindicación para este tipo de inmunizaciones cuando el tratamiento con MTX se haya iniciado. **[NE: II, GR: B]**10 |

| 1. **Cloroquina e hidroxicloroquina** | 1. Son FARME que han sido usados en el tratamiento de la AR por más de 50 años. Su mecanismo de acción no es aún bien entendido, pero parece que su acción antiinflamatoria se debe a la inhibición del daño mediado por la ruptura y liberación de enzimas lisosomales, de la función de los fagocitos polimorfonucleares, así como de la interferencia con la síntesis de prostaglandinas proinflamatorias.4   Por su perfil de eficacia relativamente bajo han sido relegadas de las recomendaciones en guías de práctica clínica en países desarrollados, pero por su bajo costo y adecuado perfil de seguridad, son aún consideradas como FARME útiles en los consensos generados en países latinoamericanos. |
| --- | --- |
| Línea de tratamiento en la que está indicado | Son fármacos que deben considerarse como de primera línea en las formas leves de la enfermedad o en la AR de inicio reciente sin factores pronósticos desfavorables (FR, o anti PCC positivos, y presencia de erosiones radiológicas o enfermedad extraarticular). **[NE: IV, GR: D]**14 |
| Estudios que se requieren antes del tratamiento y durante el seguimiento | Se debe realizar una valoración oftalmológica basal de rutina a todos los pacientes antes del inicio del tratamiento, y posteriormente revisión oftalmológica cada año a partir de no más de 5 años del inicio del tratamiento (o cada año desde el inicio del tratamiento en pacientes con maculopatía o factores de riesgo). Se debe realizar PFHs y PFR antes de iniciar el tratamiento  Se sugiere como pruebas de tamizaje (basal y anual) que además de la campimetría con protocolo 10-2 se suplemente con por lo menos alguna de las técnicas objetivas y sensibles recomendadas: el electrorretinograma multifocal (mfERG), la tomografía de coherencia óptica de dominio espectral (DS-TCO) o la autofluorescencia de fondo (FAF).15 |
| Monoterapia o en combinaciones (¿cuál es la mejor combinación y secuencia?) | La adición de CLQ o HCQ a la monoterapia con MTX ha probado ser eficaz en la reducción de los signos o síntomas de enfermedad activa en casos de respuesta inadecuada a la monoterapia con MTX. **[NE: I, GR: A]**14 |
| Tiempo para definir ajuste de dosis y retiro de medicamento | Debe mantenerse el manejo al menos por 3 a 6 meses antes de dictaminar falta de eficacia.**[NE: IV, GR: D]**14 |
| Dosis mínima y máxima | Cloroquina: 4 mg/kg/día  Hidroxicloroquina: 6 mg/kg/día  **[NE: IV, GR: D]**14 |
| Contraindicaciones | Alergia a derivados de las 4 aminoquinoleínas, retinopatía o disminución en campos visuales, deficiencia de glucosa 6 fosfato deshidrogenasa, *miastenia gravis*, e insuficiencia renal.**[NE: IV, GR: D]**14 |
| Casos especiales | La CLQ y la HCQ pueden ser usadas durante el embarazo.  No se recomiendan precauciones especiales en pacientes con neoplasias malignas, infecciones, en el esquema de vacunaciones o en caso de cirugía electiva o de urgencia. **[NE: IV, GR: D]**10,14 |

| 1. **Leflunomida** | Agente inmunomodulador con actividad antiproliferativa; inhibe la enzima dihidroorotato deshidrogenasa involucrada en la síntesis de pirimidina.16 |
| --- | --- |
| 1. ¿En qué línea de tratamiento está indicado? | La LEF en estudios comparados con placebo ha demostrado reducir la actividad de la enfermedad y retardar la progresión radiológica. Su eficacia fue observada al ser comparable a MTX en un metaanálisis. **[NE: I, GR: A]**17  Puede ser usada como primera línea de tratamiento en lugar de MTX en pacientes con contraindicaciones para su uso, o en segunda línea de tratamiento en caso de falla de respuesta a MTX o en terapia combinada con este inductor de remisión. **[NE: 1a, GR: A]**14 |
| Estudios que se requieren antes del tratamiento y durante el seguimiento | Previo al tratamiento y durante el seguimiento es recomendable solicitar BH, creatinina sérica, serología para hepatitis B y C y transaminasas. Repetir BH, PFH, PFR cada 4 a12 semanas durante el tratamiento. Es importante descartar embarazo y debe informarse al paciente con vida sexual activa los riesgos potenciales de un embarazo. Se debe considerar la prueba de embarazo antes de iniciar LEF en estos pacientes. |
| Monoterapia o en combinaciones (¿cuál es la mejor combinación y secuencia?) | La LEF puede ser usada tanto como monoterapia o combinada con otro FARME sintético. En caso de monoterapia, este FARME sintético deberá ser considerado como una alternativa en falla de tratamiento a MTX y después de al menos tres meses de su uso. La terapia combinada con LEF+MTX puede ser una opción terapéutica en pacientes con actividad articular persistente a pesar del uso de MTX como monoterapia. Existe evidencia que muestra superioridad en eficacia de LEF+MTX comparado con MTX+ placebo. **[NE: I++, GR: A]**10  Sin embargo, la combinación LEF+MTX incrementa el riesgo de efectos secundarios gastrointestinales particularmente toxicidad hepática. **[NE: I, GR: A]**19  La evidencia que apoya la eficacia de la combinación MTX+ LEF fue observada tempranamente en un ensayo clínico controlado aleatorizado. **[NE: I, GR: A]**18  Varias guías recomiendan esta combinación,19,20 aunque las guías Canadienses consideran que no añade ventaja a otras combinaciones y si favorecen una mayor toxicidad.13  El grupo de trabajo recomienda que aunque hay evidencia que apoya la eficacia de la combinación MTX+LEF en pacientes con inadecuada respuesta a MTX, se recomienda que esta combinación sea considerada principalmente en aquellos pacientes con actividad moderada a grave que han tenido falla a MTX. Cuando se da esta terapia combinada se debe considerar la reducción de la dosis de uno de los dos FARME así como la administración concomitante de ácido fólico. **[GR: D]**  La evidencia en la práctica clínica de la permanencia de la combinación LEF+MTX ha sido comparada con el uso de LEF como monoterapia, y se ha observado que alrededor de 65% de los pacientes permanecen con la combinación LEF + MTX a 30 meses de su uso de manera similar con LEF como monoterapia, donde 55% continuaron tratamiento en este lapso. En este mismo estudio el abandono por efectos adversos fueron alrededor de 15%, lo que representa una tasa relevante pero no mayor a la esperada con monoterapia. **[NE: I, GR: A]**21  Barrera de implementación: la combinación LEF+MTX puede ser implementada en un gran sector de la población, sin embargo, en algunos hospitales la LEF no es un fármaco disponible y en su indicación deberá considerarse el mayor costo que otros FARME. |
| Tiempo para definir ajuste de dosis y retiro de medicamento | La dosis utilizada en ensayos clínicos fase III fue 100 mg diarios durante tres días, seguidos de 20 mg/día VO. El tiempo para evaluar la respuesta o falla de tratamiento es de tres meses. |
| Dosis mínima y máxima | La dosis recomendada es de 20 mg/día VO, pero esta puede ser disminuida a 10 mg día o usarse 20 mg en días alternos4 |
| - Contraindicaciones | Embarazo y lactancia, hepatopatía, insuficiencia renal, infección por VIH o virus de hepatitis B y C. |
| - Casos especiales | LEF está contraindicada en embarazo (categoría X) y en lactancia; asimismo se recomienda la suspensión de LEF hasta dos años previos al embarazo.22 Se puede usar colestiramina 8 g tres veces al día por 11 días para reducir niveles plasmáticos a cifras consideradas como seguras (por debajo de 0.02 µg/mL, determinadas en al menos dos mediciones separadas con al menos dos semanas de intervalo entre cada medición).  En infecciones graves no es recomendable su uso, no está claramente identificado si incrementa el riesgo de infecciones en cirugía o colocación de prótesis, aunque un estudio de cohorte observó un incremento en la tasa de complicaciones de la cicatrización de la herida quirúrgica significativamente superior con LEF que con MTX.23 Debido a la larga vida media, la suspensión de LEF previa a una cirugía programada requeriría al menos dos meses, por lo que esta conducta no parece ser muy práctica.24  La aplicación de vacunas con virus vivos atenuados están contraindicadas durante la terapia con MTX y LEF. |

| 1. **Ciclofosfamida** | Agente alquilante de la clase de la mostaza nitrogenada. Su metabolito activo es la fosforamida con alto perfil de toxicidad.25 |
| --- | --- |
| 1. ¿En qué línea de tratamiento está indicado? | La información de la eficacia de ciclofosfamida en AR está basada principalmente en ensayos clínicos de baja calidad y en administración oral. Un metaanálisis que incluyó sólo dos ensayos clínicos observó una mejoría estadística en la disminución del número de articulaciones dolorosas e inflamadas en favor de la CFA en comparación a placebo, aunque no hubo una mejoría significativa en la velocidad de sedimentación globular. **[NE: II, GR: A]**26  A la vez, reportó un número menor del desarrollo de nuevas erosiones.26  Sin embargo, la tasa de reacciones adversas y discontinuación del fármaco por toxicidad es más alta en los pacientes con ciclofosfamida. **[NE: II, GR: A]**26  Por lo tanto, este grupo de trabajo considera que el tratamiento con ciclofosfamida no es recomendable para tratar actividad articular o sinovitis debido a su alto perfil de toxicidad y dado que existen mejores opciones de tratamiento para sinovitis. La CFA está justificada como línea de tratamiento en manifestaciones extraarticulares graves tales como neumonitis intersticial o vasculitis reumatoide. **[GR: D]** |
| Estudios que se requieren antes del tratamiento y durante el seguimiento | BH, creatinina sérica, EGO, evaluación dirigida para la detección de posibles infecciones (como urocultivo). La mayor toxicidad de ciclofosfamida es con la presentación oral, la cistitis hemorrágica está dada por la acroleína, por lo que se requiere valoración con EGO en forma mensual durante su uso. La toxicidad hematológica es más frecuente que la vesical con leucopenia, por lo que deberá realizarse BH mensual. Otra toxicidad relevante es la azoospermia en hombres o falla ovárica en mujeres. Incrementa el riesgo de infecciones bacterianas, aunque la ciclofosfamida intravenosa es usualmente bien tolerada. Debe descartarse embarazo antes de su inicio e informar riesgos potenciales del mismo. |
| Monoterapia o en combinaciones (¿cuál es la mejor combinación y secuencia?) | La ciclofosfamida intravenosa puede ser usada como monoterapia o en combinación con corticoesteroides, la dosis usual administrada es de 0.5 a 1 g/m2 de superficie corporal en forma intravenosa, 0.5 a 1.5 mg por kg por día.25  La forma oral no es recomendada por el panel excepto en condiciones muy especiales. **[GR: D]** |
| Tiempo para definir ajuste de dosis y retiro de medicamento | El inicio a 0.5 g/m2 de superficie corporal puede ser incrementado en un 10 a 20% de la dosis inicial en forma mensual o trimestral hasta alcanzar respuesta o alcanzar la dosis de 1 g/m2 de superficie corporal. Se considera que el efecto benéfico es observado con la administración oral a los 3 a 4 meses.25 |
| Dosis mínima y máxima | La dosis intravenosa recomendada es de 0.5 a 1 g/m2 de superficie corporal y el esquema usual de aplicación es mensual, aunque puede haber variaciones con duraciones de 6 meses a un año. |
| - Contraindicaciones | El uso de CFA debe ir acompañado de un esquema de anticoncepción efectivo en las mujeres en etapa reproductiva que tengan actividad sexual debido a que CFA está contraindicada en el embarazo (categoría D).27 Si la paciente programa el embarazo la CFA deberá suspenderse al menos 3 meses antes de la concepción.  También está contraindicada durante la lactancia, así como en pacientes que cursen con infecciones moderadas a graves, y con leucopenia moderada a grave.  La CFA se asocia con múltiples efectos secundarios (cistitis hemorrágica, náusea, vómito, leucopenia, trombocitopenia, alopecia, amenorrea, mayor riesgo de infecciones -incluido herpes zoster-); se ha demostrado tiene una alta tasa de abandono comparada con placebo (OR 2.9). **[NE: II, GR: A]**26 |
| - Casos especiales | La CFA puede provocar atrofia ovárica cuando su uso es por más de seis meses, o incluso antes en algunos pacientes.  La CFA está contraindicada durante el embarazo debido a su embriotoxicidad (genera defectos faciales y del paladar, aplasia/hipoplasia de los dedos de manos y pies, ano imperforado, defectos oculares, microcefalia, hipotonía y pancitopenia). El uso del fármaco en el segundo o tercer trimestres no parece incrementar el riesgo de anormalidades congénitas, aunque su uso está contraindicado.  En cirugía no hay información suficiente para identificar el riesgo de complicaciones, sin embargo, es razonable considerar que los pacientes que son sometidos a un procedimiento quirúrgico que reciben terapia con este inmunosupresor deberán ser apropiadamente vigilados para evaluar el desarrollo de infecciones que requieran tratamiento oportuno. **[GR: D]** |

| 1. **Azatioprina** | Agente inmunosupresor, análogo de las purinas, es un antimetabolito cíclico específico que es efectivo a través de su metabolito 6-mercaptopurina.26 |
| --- | --- |
| 1. ¿En qué línea de tratamiento está indicado? | Se considera de segunda línea de tratamiento ya que no se recomienda su uso como tratamiento inicial para control de actividad articular. Tiene una eficacia superior a placebo en reducir el número de articulaciones dolorosas. **[NE: 2++, GR: B]**26  El grupo de trabajo sugiere que este FARME puede ser recomendado en casos específicos como en pacientes con contraindicación a MTX, falla a MTX o a otro FARME, especialmente en pacientes con manifestaciones extraarticulares graves. No hay evidencia de que previene progresión de la enfermedad por hallazgos radiográficos.**[GR: D]**  No existen estudios que indiquen retarda la progresión radiológica o mejora el estado funcional a largo plazo.  Es una posible opción terapéutica durante el embarazo en pacientes con AR activa. **[NE: 3, GR: D]**27 |
| Estudios que se requieren antes del tratamiento y durante el seguimiento | BH completa, transaminasas, creatinina sérica (la BH y las transaminasas deben ser evaluadas al completar el primer mes de tratamiento). |
| Monoterapia o en combinaciones (¿cuál es la mejor combinación y secuencia?) | Puede ser usada como mono o terapia combinada con otros FARME. **[NE: I, GR: A]**13  Se ha utilizado en terapias combinadas. Las combinaciones usadas reportadas incluyen AZA + MTX, o AZA + HCQ + MTX.13 |
| Tiempo para definir ajuste de dosis y retiro de medicamento | La dosis inicial es de 1 mg/kg o de 50 a 100 mg por día (administrada en una sola dosis o dividida en dos). La dosis se puede incrementar a las 6 a 8 semanas a 1.5 mg/kg/día en periodos de cuatro semanas, sólo en caso de no existir toxicidad y si la respuesta es insatisfactoria. Los incrementos de dosis deben ser 0.5 mg/kg/día, hasta una dosis máxima de 2.5 mg/kg/día.25 La respuesta terapéutica aparece de 6 a 8 semanas; tiene un inicio de acción lenta, alcanzando el pico máximo alrededor de 4 a 6 meses del inicio de tratamiento.25 |
| Dosis mínima y máxima | La dosis es de 1 a 3 mg/kg/día VO. |
| - Contraindicaciones | La AZA está contraindicada en infecciones por virus de hepatitis B o C, en caso de hepatopatías o elevación de transaminasas, pancreatitis, anemia aplásica, leucopenia, linfoma, infecciones moderadas o graves por bacterias u hongos o en pacientes con deficiencia de tiopurina S-metiltransferasa. |
| - Casos especiales | Se puede usar durante el embarazo (se considera fármaco categoría D por la FDA), no afecta la fertilidad, puede ser usada en caso de manifestaciones extraarticulares como vasculitis o neumopatía intersticial o en AR moderada a grave.  Se recomienda la suspensión de la AZA en caso de infecciones.  La cantidad de 6-mercaptopurina encontrada en leche materna es muy baja (< 0.008 mg/kg/día) por lo que se considera un fármaco seguro en el periodo de lactancia.25  Se recomienda suspender la administración de AZA en el periodo posoperatorio de la colocación de prótesis de reemplazo articular al menos hasta que se normalice la función intestinal y renal de los pacientes. |

| 1. **Sulfasalazina** | Pertenece al grupo de salicilatos y sulfonamidas, es metabolizada por las bacterias intestinales a sulfapiridina y ácido aminosalicílico. El metabolito sulfapiridina posee efectos inmunomoduladores sobre los linfocitos y neutrófilos, así como propiedades de quimiotaxis, además de la síntesis de prostaglandinas. Tiene vida media de 5 a 10 horas; su metabolismo es intestinal.4 |
| --- | --- |
| Línea de tratamiento en la que está indicado | Cuando se contraindica MTX, puede utilizarse SSZ, y deberá ser considerada en la primera línea de tratamiento. Tiene una eficacia mayor que placebo y buena tolerabilidad. **[NE: 1a, GR: A]** 4 |
| Estudios que se requieren antes del tratamiento y durante el seguimiento | Antes de usar SSZ deberá de realizarse BH, PFH y EGO, independientes a la determinación de reactantes de fase aguda.  En el seguimiento se recomienda BH y PFH cada cuatro semanas en el primer trimestre de tratamiento y posteriormente cada tres meses. |
| Monoterapia o en combinaciones (¿cuál es la mejor combinación y secuencia?) | Cuando el objetivo es alcanzar la remisión de la enfermedad o reducir su actividad y no se logra con el MTX, el uso combinado de FARME sintéticos es recomendado. **[NE: 1, GR: A]** 6  La SSZ puede ser utilizada en la combinación MTX/HCQ/SSZ. Otras combinaciones incluyen LEF+SSZ o SSZ+HCQ. |
| Tiempo para definir ajuste de dosis y retiro de medicamento | Iniciar con dosis de 500 mg a 1g/día VO e ir ascendiendo cada dos semanas hasta alcanzar la dosis máxima de 3 g/día por VO.4 |
| Dosis mínima y máxima | Rango dosis de 1 a 3 g/día VO. |
| - Contraindicaciones | Hipersensibilidad a la formulación o a los metabolitos activos. Deberán evitarse en caso de obstrucción intestinal o urinaria. |
| - Casos especiales | Efectos sobre el feto probablemente ninguno, puede ser utilizado en la lactancia con precaución, puede ser usado durante el embarazo (clasificación de la FDA B y D). Las reacciones adversas con el uso de SSZ son en general leves y no requieren suspensión de tratamiento. |

| **D-penicilamina** | Sustancia quelante que ayuda en la eliminación de cobre, plomo y mercurio, formando complejos eliminados por vía renal. En AR diversos estudios demostraron que podía disociar macromoléculas como el factor reumatoide. Se le atribuyen propiedades de agente inmunomodulador.28 |
| --- | --- |
| Línea de tratamiento en la que está indicado | FARME sintético para ser considerado en AR leve como monoterapia o en combinación con MTX. Un metaanálisis demuestra su superioridad sobre placebo. **[NE: 2++, GR: A]** 29  Parece tener un efecto benéfico clínico y estadísticamente significativo en el control de la AR, pero con toxicidad mayor. |
| Estudios que se requieren antes del tratamiento y durante el seguimiento | Se recomienda BH completa, creatinina y EGO. Los estudios se deben repetir cada dos semanas una vez se alcanza la dosis estable y posteriormente se da el seguimiento con estos estudios paraclínicos cada dos a tres meses. |
| Monoterapia o en combinaciones (¿cuál es la mejor combinación y secuencia?) | Ha sido utilizada en combinación con MTX y otros FARME cuando ha habido una respuesta parcial a la monoterapia, sin embargo, la evidencia es limitada para establecer conclusiones definitivas. **[NE: 2++, GR: A]** 29 |
| Tiempo para definir ajuste de dosis y retiro de medicamento | Se recomienda iniciar con dosis de 125 a 250 mg/día VO y aumentar la dosis cada ocho semanas hasta alcanzar 750 mg/día, en caso de no obtener respuesta a los 3 a 4 meses con dosis de 1.5 g/día, se debe considerar retirar el fármaco. **[NE: 2++, GR: A]** 29  El medicamento se administra dos horas antes del alimento principal. |
| Dosis mínima y máxima | Rango de dosis 125 mg a 1.5 g/día VO. |
| - Contraindicaciones | Nefropatías, discrasias sanguíneas (leucopenia, trombocitopenia). |
| - Casos especiales | Se recomienda no usar durante el embarazo y la lactancia ya que puede causar alteraciones del tejido conjuntivo en el feto (clasificación D en la FDA). |
| ¿Se pueden suspender y cómo?  En caso de suspensión (que no sea por toxicidad), ¿cuál es la estrategia de tratamiento? | Debe considerarse la suspensión de los FARME sintéticos, incluido el MTX, CLQ y la HCQ en caso de remisión prolongada, siempre y cuando los glucocorticoides y los agentes biológicos hayan sido suspendidos previamente.  Sin embargo, no hay evidencias donde se haya evaluado el tiempo de lo que se considera remisión prolongada, ni la pauta temporal de suspensión del FARME, por lo que este evento y el manejo posterior deben ser dejados a la consideración del médico tratante en ese momento. **[NE: IV, GR: D]**10 |

**ANTI TNF**

| **Adalimumab** | Anticuerpo humano monoclonal específico contra TNF humano. |
| --- | --- |
| Línea de tratamiento en la que está indicado | Adalimumab está indicado cuando hay una respuesta inadecuada a FARME (incluyendo el MTX), también indicado cuando hay una AR grave, activa y progresiva, en adultos que previamente no han sido tratados con MTX. **[NE: I, GR: A]**30  El adalimumab puede ser dado en combinación con MTX para el manejo de AR activa grave con falla a por lo menos dos FARME no biológicos (incluyendo al menos un anti TNF, y quienes no pueden recibir RTX o tienen contraindicación por efectos adversos), excepto en los casos en los que el MTX esté contraindicado por poca tolerancia o se considere inapropiado. **[NE: I, GR: A]**30  Se puede considerar como alternativa cuando el primer anti TNF se retiró por efectos adversos. **[NE: I, GR: A]**30  Barrera de implementación: costo y disponibilidad a nivel institucional |
| Monoterapia o en combinaciones (¿cuál es la mejor combinación y secuencia?) | El adalimumab puede ser dado con MTX excepto en los casos en los que el MTX esté contraindicado por poca tolerancia o se considere inapropiado. **[NE: I, GR: A]**30  Barrera de implementación: costo y disponibilidad a nivel institucional. |
| Tiempo para definir ajuste de dosis y retiro de medicamento | El tratamiento con anti TNF debe continuarse sólo si existe una respuesta a los seis meses. **[NE: I, GR: A] 4**  Si el paciente experimenta remisión y ésta se sostiene por lo menos 12 meses continuos, el reumatólogo puede optar por reducir dosis o espaciar el tiempo de aplicación del biológico, especialmente si el tratamiento es combinado con FARME convencionales. **[NE: 3, GR: B] 31**  El tratamiento con adalimumab debe continuarse cuando haya una buena respuesta, sobre todo si ésta es evaluada por los diferentes índices de clinimetría a los seis meses de haber iniciado la terapia. . **[NE: I, GR: A]31**  En caso de que no se logre una disminución de por lo menos 1.2 en el DAS 28 a los seis meses, se debe ajustar la dosis incrementando a 40 mg. **[NE: I, GR: A]**30 |
| Dosis mínima y máxima | Adalimumab se administra a dosis de 40 mg cada 14 días por vía subcutánea. Si los pacientes no experimentan una disminución en la actividad, la dosis puede incrementarse a una inyección de 40 mg semanales. **[NE: I, GR: A]**4 |
| - Contraindicaciones | Adalimumab está contraindicado en pacientes con insuficiencia cardiaca congestiva de moderada a grave, con TB activa o con infecciones oportunistas graves.**14**  Contraindicaciones absolutas para el uso de anti TNF: infección activa, administración concurrente con vacunas de virus vivos, historia reciente (menos de cinco años) de neoplasia maligna, excepto en el caso de cáncer de células basales, insuficiencia cardiaca congestiva clases III o IV de la NYHA o enfermedad desmielinizante. **[NE: I, GR: A]31** |
| - Casos especiales | El tratamiento profiláctico antituberculoso debe ser iniciado por lo menos tres semanas antes del inicio de anti TNF. **[NE: 2, GR: B]13**  La terapia biológica no debe iniciarse en mujeres embarazadas o que estén lactando. Si el embarazo ocurriera durante la terapia, ésta se tiene que suspender. **[NE: I, GR: A]14**  No existe evidencia que sugiera que es una contraindicación para iniciar la terapéutica, sin embargo, se tiene que tomar en cuenta el mayor riesgo de infecciones particularmente en mayores de 75 años.  **Ver sección de eventos adversos para terapia con anti TNF* |

| **Etanercept** | Receptor soluble del TNF que bloquea su unión a receptor de membrana celular y sus efectos. |
| --- | --- |
| Línea de tratamiento en la que está indicado | Etanercept se recomienda como segunda línea en pacientes que han fallado al tratamiento con la combinación de al menos dos FARME convencionales (uno de ellos tiene que ser MTX a menos de que exista contraindicación), a dosis óptima, al menos por un periodo de 12 semanas. **[NE: I, GR: A]6**  La falla se define como actividad moderada a grave de la AR (según los puntajes de las herramientas de clinimetría validadas).  En casos especiales en donde existe intolerancia a los FARME convencionales o cuando existe grado elevado de actividad de la enfermedad en pacientes con factores de mal pronóstico y con progresión rápida de daño estructural, el etanercept puede ser utilizado como tratamiento de primera línea, en monoterapia o combinado con FARME tradicionales. El tratamiento combinado se ha reportado más eficaz que la monoterapia, pero en casos especiales se puede utilizar como monoterapia (pacientes intolerantes a MTX o a otros FARME tradicionales). **[NE: I, GR: A]6**  Barrera de implementación: costo y disponibilidad institucional |
| Monoterapia o en combinaciones (¿cuál es la mejor combinación y secuencia?) | La terapia combinada con MTX eleva los porcentajes de respuesta a etanercept. **[NE: I, GR: A]6**  En casos especiales, el etanercept puede funcionar como monoterapia, sin embargo, la evidencia marca mayor eficacia con terapia combinada. **[NE: I, GR: A]6**  Barrera de implementación: costo y disponibilidad a nivel institucional |
| Tiempo para definir ajuste de dosis y retiro de medicamento | De 12 a 16 semanas.  **[GR: D]** |
| Dosis mínima y máxima | 25 mg SC dos veces por semana o 50 mg SC cada semana. |
| - Contraindicaciones | Infecciones activas (incluyendo TB activa), insuficiencia cardiaca moderada a grave (NYHA clases III/IV), sepsis o riesgo de sepsis, enfermedad desmielinizante del sistema nervioso y cáncer. Las infecciones agudas o crónicas activas constituyen una contraindicación absoluta, así como la presencia de tumores no erradicados. **[NE: 2, GR: B]31** |
| - Casos especiales | Contraindicado durante el embarazo y la lactancia. **[NE: 3, GR: C]31**  El tiempo que debe de suspenderse el etanercept previo a la cirugía no está determinado, en algunos estudios se recomienda de 3 a 5 vidas medias del producto. **[NE: 4, GR: D]31**  Existen reportes de linfomas cutáneos de casos con etanercept e IFX, sin embargo, la fuerza de asociación es débil.  También se han reportado casos aislados de melanoma con un bajo grado de asociación con el uso de etanercept y adalimumab.  **Ver sección de eventos adversos para terapia con anti TNF* |

| **Infliximab** | Anticuerpo monoclonal quimérico (murino-humano) que se une al TNFα neutralizando su acción sobre macrófagos, y otras células de la inmunidad innata y adquirida. |
| --- | --- |
| Línea de tratamiento en la que está indicado | El IFX se puede usar ante la falla de MTX o desde un inicio en combinación con MTX. **[NE: I, GR: A]**30  Barrera de implementación: costo y disponibilidad a nivel institucional |
| Monoterapia o en combinaciones (¿cuál es la mejor combinación y secuencia?) | Se puede administrar en terapia combinada con MTX, o posterior a la falla del mismo. **[NE: I, GR: A]**30  Barrera de implementación: costo y disponibilidad a nivel institucional |
| Tiempo para definir ajuste de dosis y retiro de medicamento | De 12 a 16 semanas del inicio de su administración. **[NE: 4, GR: D]**30 |
| Dosis mínima y máxima | Dosis mínima: 3 mg/kg IV en la visita inicial, a las dos semanas, a las seis semanas y luego cada ocho semanas.  Se puede incrementar la dosis hasta 5 mg/kg IV pero exceder esta dosis se asocia a una mayor tasa de efectos adversos. (**[NE: I, GR: A]**10 |
| - Contraindicaciones | Alergia al principio activo o excipientes, TB activa, infecciones graves, insuficiencia cardiaca moderada a grave (NYHA clases III/IV), sepsis o riesgo de sepsis, infecciones activas, enfermedad desmielinizante y tumores, particularmente linfoma. |
| - Casos especiales | IFX se encuentra contraindicado durante el embarazo y la lactancia.4  No está claro el riesgo de infección perioperatoria, ni cuánto tiempo antes de una intervención quirúrgica se debe suspender IFX.  No se recomienda su asociación con anakinra ni con abatacept porque aumenta el riesgo de infecciones.  **Ver sección de eventos adversos para terapia con anti TNF* |

| Estudios que se requieren antes del tratamiento y durante el seguimiento | En la valoración inicial se debe solicitar una BH completa, reactantes de fase aguda (VSG, PCR), QS, EGO, perfil para hepatitis B y C, serología para VIH (sólo en grupos de alto riesgo), radiografía del tórax, PPD y/o quantiferón (para descartar la presencia de TB latente o activa).  **[NE: 1, GR: A]**13  Se debe realizar un escrutinio para TB latente o activa. La realización de PPD con induración mayor a 5 mm se considera riesgo de TB latente y se requiere tratamiento antituberculoso antes de iniciar el manejo con anti TNF. **[NE: 1, GR: A]**13  La utilización del quantiferón se considera un método diagnóstico alternativo para diagnosticar TB latente. **[NE: 4, GR: D]**13  Barrera de implementación: la utilización del quantiferón en nuestro medio es una limitante por el costo y por la poca disponibilidad.  No existen datos suficientes con relación a repetir en el seguimiento el PPD o el quantiferón, salvo en casos especiales.  En mujeres en edad reproductiva se debe realizar prueba de embarazo.  Se deben de descartar infecciones activas, procesos neoplásicos y enfermedades autoinmunitarias (solicitar anti DNA y ANA cada 3 meses durante el primer año y posteriormente cada seis meses). **[NE: 2, GR: B]**30  Para seguimiento se debe solicitar BH, PFH y QS y reactantes de fase aguda cada 3 a 4 meses. **[NE: 2, GR: B]**30  En caso de estar recibiendo profilaxis antifímica se debe solicitar BH y PFH cada dos semanas durante dos meses y posteriormente controles mensuales. |
| --- | --- |
| ¿Se pueden suspender y cómo?  En caso de suspensión (que no sea por toxicidad), ¿cuál es la estrategia de tratamiento? | Después de un episodio infeccioso, el anti TNF no debe ser reiniciado hasta después de un periodo de 8 días posterior al retiro del antimicrobiano y que no haya datos de recurrencia. **[NE: 2, GR: B]**30  Cuando durante el tratamiento se tiene la sospecha de infección bacteriana oportunista se tiene que suspender el anti TNF. **[NE: 2, GR: B]**30  Después de falla o toxicidad a etanercept se puede indicar un segundo anti TNF; sin embargo, la evidencia actual denota que cambiar de mecanismo de acción es una mejor opción y eleva los niveles de respuesta en lugar de iniciar un segundo anti TNF. La posibilidad de buena respuesta es mayor en aquellos pacientes en quienes se suspendió el primer anti TNF por toxicidad y no por ineficacia; en estos últimos la posibilidad de respuesta es menor. **[NE: 2, GR: B]**30  Existen reportes en la literatura médica en donde al lograrse la remisión completa de la enfermedad por al menos 3 a 6 meses con etanercept, se puede intentar el prolongar los periodos de aplicación o llevar a la suspensión del mismo y vigilar la evolución. **[NE: 4, GR: d]**30  En caso de que se deba suspender el tratamiento con anti TNF, se recomienda continuar con FARME tradicional y vigilar el tiempo la respuesta clínica. **[NE: 4, GR: D]**30 |

| **Certolizumab** | Biológico anti TNF constituido por el fragmento Fab´ de un anticuerpo monoclonal anti TNF α humanizado. |
| --- | --- |
| Línea de tratamiento en la que está indicado | No hay experiencia en tratamiento inicial. Se recomienda administrar ante la falla a MTX o FARME. **[NE: 2+, GR: C]**32  Se ha utilizado con éxito en pacientes refractarios a anti TNF. **[NE: 2+, GR: C]**33 |
| Monoterapia o en combinaciones (¿cuál es la mejor combinación y secuencia?) | Se recomienda combinar con MTX (15 a 20 mg/semana). **[NE: 2+, GR: C]**34 |
| Tiempo para definir ajuste de dosis y retiro de medicamento | La respuesta a los tres meses predice respuesta a largo plazo. **[NE: 1, GR: A]**34  Después de un año de remisión se puede suspender. **[NE: 4, GR: D]**4 |
| Dosis mínima y máxima | 400 mg SC al inicio y 200 mg SC cada 15 días, o 400 mg SC cada mes. **[NE: 1, GR: A]**32 |
| - Contraindicaciones | No se debe administrar en pacientes con riesgo de Tb activa, enfermedad desmielinizante, enfermedad cardiovascular significativa, enfermedad lupoide y tumores malignos sólidos de menos de 5 años de erradicación. **[NE: 1, GR: A]**14 |
| - Casos especiales | No se encuentra indicado en mujeres embarazadas. No hay indicaciones en la periodicidad de exámenes de detección de Tb. Las vacunas recomendadas son las antiinfluenza, antimeningocóccica, antihepatitis y antineumocóccica. No hay recomendaciones respecto a cirugía.14 |

| **Golimumab** | Anticuerpo monoclonal humano |
| --- | --- |
| Línea de tratamiento en la que está indicado | Tiene experiencia en pacientes con AR vírgenes a tratamiento con MTX o algún otro FARME. **[NE: 1, GR: A]**35  Se recomienda administrar ante la falla a MTX o en pacientes refractarios a anti TNF. **[NE: 1, GR: A]**36 |
| Monoterapia o en combinaciones (¿cuál es la mejor combinación y secuencia?) | Se recomienda combinar con MTX. **[NE: 1, GR: A]**37 |
| Tiempo para definir ajuste de dosis y retiro de medicamento | Después de un año de remisión. **[NE: 4, GR: D]**4 |
| Dosis mínima y máxima | 50 mg/mensuales a 100 mg/mensuales SC. 2-4 mg/kg IV cada 12 semanas. **[NE: 4, GR: D]**38 |

| Estudios que se requieren antes del tratamiento y durante el seguimiento | Al inicio se recomienda detección de Tb por PPD y placa de tórax (o lineamientos nacionales). **[NE: 1, GR: A]**38  Previo al inicio de terapia biológica se recomienda descartar riesgo de tuberculosis activa, enfermedad desmielinizante, enfermedad cardiovascular significativa, enfermedad lupoide, tumores malignos sólidos de menos de 5 años de erradicación, PFH y renal, perfil de hepatitis y considerar estudios adicionales en base a características del paciente. **[NE: 1, GR: A]**4 |
| --- | --- |
| ¿Se pueden suspender y cómo?  En caso de suspensión (que no sea por toxicidad), ¿cuál es la estrategia de tratamiento? | Se suspenden después de un año de remisión. **[NE: 1, GR: A]**4 |
| Contraindicaciones | No se debe administrar en pacientes con riesgo de Tb activa, enfermedad desmielinizante, enfermedad cardiovascular significativa, enfermedad lupoide y tumores malignos sólidos de menos de 5 años de erradicación. **[NE: 1, GR: A]**4 |
| Casos especiales | No se encuentra indicado en mujeres embarazadas. No hay indicaciones en la periodicidad de exámenes de detección de Tb. Las vacunas recomendadas son las antiinfluenza, antimeningocóccica, antihepatitis y antimeumocóccica. No hay recomendaciones respecto a cirugía. **[NE: 1, GR: A]**4 |

**RITUXIMAB, TOCILIZUMAB Y ABATACEPT**

| **Rituximab** | Anticuerpo monoclonal quimérico (murino-humano) diseñado por ingeniería genética, dirigido contra el antígeno CD20, que se expresa casi exclusivamente en las células B, y que ocasiona una depuración de la población de estas células. |
| --- | --- |
| Línea de tratamiento en la que está indicado | El RTX se recomienda para el tratamiento de pacientes con AR y FR y/o anticuerpos antipéptidos cíclicos citrulinados positivos, después de una respuesta inadecuada al tratamiento con FARME o con un agente anti TNF. **[NE: 1, GR: A]**6  Se puede utilizar antes de un agente anti-TNF en pacientes que tienen una contraindicación relativa o absoluta para recibir un anti-TNF. **[NE: 1, GR: A]**39  También hay situaciones especiales como el antecedente de un linfoma de células B, o la presencia de tuberculosis latente, esclerosis múltiple, vasculitis concomitante o síndrome de superposición, en las que se prefiere usar RTX. **[NE: 1, GR: A]**6  Los pacientes que tienen FR y/o anticuerpos antipéptidos cíclicos citrulinados positivos tienen mayor probabilidad de responder al RTX que los pacientes que no tienen dichos anticuerpos. **[NE: 1, GR: A]**39  Si embargo la ausencia de los anticuerpos no descarta la respuesta aunque la eficacia obtenida es menor que en los pacientes seropositivos. **[NE: 1, GR: B]**13  Se recomienda también que, en pacientes que no han respondido al tratamiento con dos agentes anti TNF, se cambie a un biológico con un mecanismo de acción diferente (RTX, abatacept o TCZ). **[NE: 2/4, GR: C]**6  *Barreras de implementación*: El RTX es un medicamento muy caro y no está disponible en todas las instituciones de salud, sólo en el Instituto Mexicano del Seguro Social (IMSS) y en el Instituto de Seguridad y Servicios Sociales de los Trabajadores del Estado (ISSSTE). |
| Estudios que se requieren antes del tratamiento y durante el seguimiento | Antes de iniciar el tratamiento se deben realizar BH, QS y PFH.6  En cuanto al escrutinio para Tb, no se han publicado hasta la fecha datos que muestren un aumento en el riesgo de contraer Tb con el uso de RTX. Esto ha ocasionado que la recomendación para realizar el escrutinio para Tb latente sea controvertida. Algunos recomiendan realizarlo mientras no se conozca bien el riesgo. **[NE: 4, GR: C]**40  El escrutinio consiste en realizar un PPD y una teleradiografía de tórax en población con factores epidemiológicos de riesgo. Algunos recomiendan la realización de quantiferón. **[NE: 4, GR: D]**30  Los niveles de inmunoglobulina deben determinarse antes de iniciar RTXb, así como 4 a 6 meses después de las infusiones y antes de dar una nueva infusión. **[NE: 4, GR: C]**39  Se deben investigar los factores de riesgo para hepatitis B y C en todos los pacientes que vayan a ser tratados con RTX. En los pacientes que sean positivos para el virus de la hepatitis B, se debe valorar el riesgo-beneficio, ya que el tratamiento puede ser seguro si se da un tratamiento antiviral apropiado. El tratamiento con RTX puede ser seguro en pacientes con hepatitis C, pero hay algunos reportes de reacciones graves a la infusión en hasta el 25% de los pacientes. La serología para hepatitis C debe ser monitorizada en pacientes con evidencia pasada o presente de infección por hepatitis B o C. **[NE: 4, GR: C]**39  Se debe realizar escrutinio para VIH en los pacientes con riesgo alto para contraer la infección. **[NE: 4, GR: D]**40  Es deseable monitorizar los niveles de células B. **[GR: D]**  *Barreras de implementación*: El quantiferón es caro y está disponible solo en algunos sitios. Los niveles de inmunoglobulinas y los de células B no se realizan en todos los sitios. |
| Monoterapia o en combinaciones (¿cuál es la mejor combinación y secuencia?) | El RTX debe ser administrado junto con MTX. Un curso de RTX consiste en 2 infusiones intravenosas de 1 g, con un intervalo de 2 semanas entre cada una. **[NE: I, GR: A]**41  No se debe esperar a que la enfermedad se active para dar un nuevo curso de tratamiento. El nuevo curso se puede dar tan pronto como a los 6 meses si el paciente tuvo una respuesta inicial, pero tiene sinovitis persistente. **[NE: 2/4, GR: C]**6  Sin embargo, si la AR se mantiene inactiva, se puede llegar a administrar 9 o más meses después del primer curso. Esto permite u ahorro considerable de dinero en nuestro medio. **[GR: D]**  El nuevo tratamiento se debe decidir con base en las manifestaciones clínicas, no en el número de células B. **[NE: 3, GR: B]**39  El RTX se puede utilizar, ya sea solo o en combinación con LEF si el MTX está contraindicado. **[NE: 3, GR: B]**39 |
| Tiempo para definir ajuste de dosis y retiro de medicamento | El consenso español de uso de RTX en AR considera que el momento más adecuado para evaluar la respuesta al RTX debe ser alrededor de la semana 16. **[NE: 1, GR: A]**13  Sin embargo de, las guías de la Sociedad Británica de Reumatología (BSR) sobre el uso de RTX en AR consideran que el momento ideal es a la semana 24. **[NE: 2, GR: B]**39  Por otro lado, se recomienda que si un paciente tiene todavía actividad moderada o alta después de 6 meses de tratamiento con un agente biológico no anti TNF y la falla se debe a falta de beneficio, se debe cambiar a otro agente biológico no anti TNF o a un agente anti-TNF. **[NE: 2, GR: B]**41  Se prefiere un período de 6 meses en lugar de 3 meses debido a que se puede requerir un período más largo de tiempo para obtener la eficacia de un agente biológico no anti TNF. 42 |
| Dosis mínima y máxima | La dosis consiste en 2 infusiones intravenosas de un gramo, con un intervalo de 2 semanas entre cada una. **[NE: 1, GR: A]**41  Sin embargo la administración de 2 dosis intravenosas de 500 mg con un intervalo de 2 semanas se puede considerar particularmente en pacientes con AR activa que hayan tenido una respuesta inadecuada a los FARME tradicionales como el MTX, y que no hayan recibido otro agente biológico. En este contexto se han obtenido resultados similares entre los 2 esquemas terapéuticos. **[NE: 1, GR: A]**20 |
| - Contraindicaciones | El RTX está contraindicado en pacientes con infecciones activas graves u oportunistas o en los que tienen inmunosupresión grave, como es el caso de la hipogammaglobulinemia o cuando los niveles de las células CD4 o CD8 son muy bajos. Se debe tener cuidado cuando se considere el uso de RTX en pacientes con historia de infecciones crónicas o recurrentes o con condiciones concomitantes que puedan predisponer a los pacientes a una infección seria. **[NE: 3, GR: B]**39  El RTX está contraindicado en pacientes con insuficiencia cardíaca o cardiopatía graves no controlada.41 |

| **Tocilizumab** | Anticuerpo monoclonal recombinante humanizado, antihumano, dirigido contra el receptor de la IL-6. |
| --- | --- |
| Línea de tratamiento en la que está indicado | El TCZ se recomienda para el tratamiento de pacientes con AR después de una respuesta inadecuada al tratamiento con FARME o con un anti TNF. **[NE: 1, GR: A]**6  Se recomienda también que, en pacientes que no han respondido al tratamiento con dos agentes anti TNF, se cambie a un biológico con un mecanismo de acción diferente (RTX, abatacept o TCZ). **[NE: 2/4, GR: C]**6  Barreras de implementación: El TCZ es un medicamento muy caro y no está disponible e todas las instituciones de salud, sólo en el IMSS y en el ISSSTE. |
| Estudios que se requieren antes del tratamiento y durante el seguimiento | Antes de iniciar el tratamiento se deben realizar BH, QS, PFH, perfil de hepatitis B y C, así como pruebas de escrutinio para TB (latente). **[NE: 4, GR: D]**6  Algunos recomiendan también la realización de quantiferón. Nuestro grupo recomienda realizar también perfil de lípidos.  Durante el seguimiento se recomienda realizar BH, QS, PFH y perfil de lípidos, en forma mensual durante los primeros 3 meses, y posteriormente cada 3 a 4 meses. **[NE: 4, GR: D]**14 |
| Monoterapia o en combinaciones (¿cuál es la mejor combinación y secuencia?) | Se recomienda usar el TCZ en combinación con MTX. **[NE:1++, GR: A]**14  Se puede administrar como monoterapia en caso de que exista intolerancia a MTX, o si el tratamiento continuo con MTX se considera inapropiado. Algunos estudios han mostrado una eficacia similar con la monoterapia que con la combinación con MTX. **[NE: 1, GR: A]**6 |
| Tiempo para definir ajuste de dosis y retiro de medicamento | Se recomienda que si un paciente tiene todavía actividad moderada o alta después de 6 meses de tratamiento con un agente biológico no anti TNF y la falla se debe a falta de beneficio, se debe cambiar a otro agente biológico no anti TNF o a un agente anti TNF. **[NE: 3, GR: B]**42 |
| Dosis mínima y máxima | El TCZ se administra en una infusión intravenosa que dura 1 hora. La dosis recomendada es 8 mg/kg cada 4 semanas. La dosis máxima es de 800 mg por infusión, por lo que no se debe administrar una dosis mayor en pacientes que pesan más de 100 kg. **[NE: 1, GR: A]**43  La dosis de 4 mg/kg cada 4 semanas se puede utilizar también, sin embargo, los ensayos clínicos han mostrado tendencia a la superioridad de la dosis de 8 mg/kg (aunque sin diferencia estadística significativa), sobre todo cuando se utilizan los parámetros más altos de eficacia (ACR70) y en pacientes que no respondieron a un agente anti-TNF. **[NE: 1, GR: A]**44  Están por aprobarse para su administración subcutánea dosis estandarizadas.  Barreras de implementación: ninguna. |
| - Contraindicaciones | El TCZ está contraindicado en pacientes con infecciones activas graves u oportunistas.43 Se debe tener cuidado en pacientes con historia de infecciones recurrentes o crónicas o que tengan comorbilidades (diverticulitis, diabetes y enfermedad pulmonar intersticial) que puedan predisponer a los pacientes a tener infecciones. No se debe iniciar en pacientes con una cuenta absoluta de neutrófilos menor a 2,000/mm3.  Nivel de evidencia: 1  Grado de recomendación: A  En caso de que exista elevación de las amino transferasas, la dosis se debe disminuir a 4 mg/kg, si la elevación persiste, se debe suspender el medicamento. 45 |

| **Abatacept** | Proteína de fusión completamente humana, diseñada por ingeniería genética que bloquea la coestimulación, proceso clave en la activación de las células T. |
| --- | --- |
| Línea de tratamiento en la que está indicado | El abatacept se recomienda para el tratamiento de pacientes con AR después de una respuesta inadecuada al tratamiento con FARME o con un agente anti-TNF. **[NE: 1, GR: A]**6  Se recomienda también que, en pacientes que no han respondido al tratamiento con dos agentes anti TNF, se cambie a un biológico con un mecanismo de acción diferente (RTX, abatacept o TCZ). **[NE: I, GR: B]**6  El abatacept se puede usar también como tratamiento de primera línea, en combinación con MTX, de acuerdo a los resultados del estudio AGREE (ensayo clínico) **[NE: II, GR: B]**46 y del análisis post hoc de los datos de dicho estudio. 47    *Barreras de implementación*: El abatacept es un medicamento muy caro y no está disponible en todas las instituciones de salud. |
| Estudios que se requieren antes del tratamiento y durante el seguimiento | Antes de iniciar el tratamiento se debe realizar BH completa, QS, PFH, pruebas de escrutinio para virus de Hepatitis B y C, así como escrutinio para Tb. **[NE: 4, GR: D]**6  El escrutinio para VIH se recomienda sólo en pacientes de alto riesgo. **[NE: 4, GR: D]**6  Barreras de implementación: El quantiferón es muy caro y está disponible sólo en algunos sitios. |
| Monoterapia o en combinaciones (¿cuál es la mejor combinación y secuencia?) | El abatacept debe usarse en combinación con MTX. **[NE: I, GR: B]**6  El abatacept se administra en una infusión intravenosa de 30 minutos. Después de una infusión inicial (semana 0), se repite a la semana 2, semana 4 y después cada 4 semanas. Los pacientes requieren un total de 14 infusiones el primer año y 13 infusiones los años siguientes. **[NE: I, GR: B]**30 |
| Tiempo para definir ajuste de dosis y retiro de medicamento | Se recomienda que si un paciente tiene todavía actividad moderada o alta después de 6 meses de tratamiento con un agente biológico no anti TNF y la falla se debe a falta de beneficio, se debe cambiar a otro agente biológico no anti TNF o a un agente anti TNF. **[NE: 2, GR: B]**6 |
| Dosis mínima y máxima | La dosis del abatacept se administra de acuerdo al peso del paciente: pacientes que pesan menos de 60 kg, aquellos que pesan de 60 a 100 kg y los que pesan más de 100 kg, requieren 500 mg, 750 mg y 1000 mg, respectivamente. **[NE: I, GR: B]**30  La utilización de abatacept por vía subcutánea, se está estudiando en ensayos clínicos. Hasta ahora, ha sido eficaz por esa vía. La dosis es de 125 mg semanales. **[NE: 2+, GR: C]**48 |
| - Contraindicaciones | El abatacept está contraindicado en pacientes con infecciones activas graves u oportunistas.13 |

| ¿Se pueden suspender y cómo?  En caso de suspensión (que no sea por toxicidad), ¿cuál es la estrategia de tratamiento? | El RTX, el TCZ y el abatacept se deben suspender cuando exista falta de eficacia o se desarrolle hipersensibilidad o intolerancia al fármaco.  En caso de suspensión por falta de eficacia, se debe cambiar a otro agente biológico no anti-TNF o a un agente anti-TNF.30 |
| --- | --- |
| Casos especiales | No hay evidencia suficiente para saber si el RTX, el TCZ o el abatacept afectan la fertilidad, por lo tanto, no hay recomendaciones al respecto.13  La experiencia con RTX en pacientes embarazadas es demasiado limitada para permitir cualquier afirmación sobre seguridad durante el embarazo.40 Existen reportes de casos de mujeres embarazadas que recibieron RTX, sobre todo para tratar padecimientos hematológicos. Se ha reportado que cuando el fármaco se administra durante el segundo y el tercer trimestre, puede ocurrir deficiencia transitoria de células B en el producto en la etapa posnatal. **[NE: 4, GR: D]**40  Debido a la falta de datos definitivos y de acuerdo a las indicaciones del producto, es recomendable suspender el RTX 52 semanas antes de un embarazo planeado, por la duración del efecto biológico del fármaco. **[NE: 4, GR: D]**40  No existen datos adecuados sobre el uso de TCZ en mujeres embarazadas.45  El riesgo potencial para los humanos se desconoce, por lo que no se recomienda usarlo durante el embarazo.  No hay datos disponibles sobre la exposición a abatacept durante el embarazo. **[NE: 4, GR: D]**40 Por lo tanto, el fármaco no se debe emplear en mujeres embarazadas. Se debe suspender 14 semanas antes de un embarazo planeado.  Con respecto a la lactancia, no se sabe si el RTX, el TCZ y el abatacept se excretan en la leche materna.40  Los agentes biológicos deben ser suspendidos antes de un procedimiento quirúrgico.30  La recomendación en todos los pacientes con AR tratados con agentes biológicos y que van a ser sometidos a una cirugía electiva, es suspender el fármaco por un período que va de 2 a 5 veces su vida media, de acuerdo al tipo de cirugía. 5 La vida media del RTX es de 21 días, por lo tanto se debe suspender de 42 a 105 días antes; el TCZ y el abatacept tienen una vida media de 13 días, por lo tanto se deben suspender de 26 a 65 días antes de la cirugía. **[NE: 4, GR: C]**30  Algunas guías recomiendan una suspensión de 2 vidas medias cuando la cirugía se realiza en un ambiente estéril (ej: cataratas) y 5 vidas medias cuando se trata de cirugías realizadas en un ambiente séptico (ej: colon) o en situaciones de riesgo de sepsis (ej: colocación de prótesis articulares). **[NE: 3, GR: C]**30  El agente biológico debe ser reiniciado en el período posoperatorio si no hay evidencia de infección y la cicatrización de la herida es satisfactoria. **[NE: 4, GR: C]**30  El RTX, el TCZ y el abatacept están contraindicados en pacientes con infecciones activas graves u oportunistas. **[NE: 1, GR: A]**30 Se debe tener cuidado cuando se considere el uso de éstos fármacos en pacientes con historia de infecciones crónicas o recurrentes o que tengan comorbilidades (diverticulitis, diabetes y enfermedad pulmonar intersticial).40  En general, el tratamiento con agentes biológicos debe ser retrasado o suspendido temporalmente en pacientes con AR con una neoplasia maligna, mientras estén recibiendo quimio o radioterapia. Las decisiones sobre el tratamiento deben ser hechas en cada caso en particular, en conjunto con el paciente y un oncólogo. **[NE: 4, GR: D]**30  En pacientes con historia de linfoma, se puede usar RTX. El TCZ y el abatacept deben utilizarse con precaución. **[NE: 4, GR: C]**30  En pacientes con historia de cáncer cutáneo que no sea melanoma o de un tumor sólido, el RTX, el TCZy el abatacept deben ser usados con precaución. **[NE: 2, GR: C]**30  Las recomendaciones de la Asociación Canadiense de Reumatología para el tratamiento de la AR indican la aplicación de las vacunas de la influenza y del neumococo antes o durante el tratamiento con RTX, TCZ o abatacept. **[NE: 2, GR: B]**30  La vacuna contra la hepatitis C debe considerarse en pacientes con alto riesgo. **[NE: 4, GR: B]**13  La vacuna contra el herpes zoster se debe considerar en pacientes de 60 años o más. **[NE: 2, GR: B]**30  Las guías británicas recomiendan que la vacuna contra en neumococo se administre 4 a 6 semanas antes de iniciar el tratamiento con RTX. **[NE: 2, GR: B]**30  Recomiendan también que la vacuna de la influenza se administre antes de que se inicie el tratamiento con RTX. Se debe administrar después en forma anual en un momento en que las células B se están recuperando. **[NE: 2, GR: B]**40  Las vacunas con virus inactivados se deben aplicar idealmente antes de iniciar el tratamiento con RTX, TCZ o abatacept, ya que pueden atenuar la respuesta inmune. **[NE: 2, GR: B]**30  Las vacunas con virus vivos atenuados se deben administrar al menos 2 semanas (idealmente 4) antes de iniciar el tratamiento con RTX, TCZ o abatacept.30 Si ya se administró el ciclo, la vacuna se debe aplicar lo más distanciado posible de dicho ciclo.3 **[NE: 4, GR: D]**13  En los pacientes que ya están recibiendo TCZ o abatacept, el tratamiento se debe suspender y la vacuna se debe aplicar después de un intervalo apropiado de tiempo, tomando en cuenta que la vida media de los fármacos es de 13 días. **[NE: 4, GR: D]**30  No se recomienda administrar las vacunas durante el tratamiento con RTX, TCZ o abatacept. **[NE: 4, GR: D]**42 |

**TOFACITINIB**

| 1. **Tofacitinib** | Es un inhibidor selectivo de la familia de las cinasas de JAK, las cuales se localizan en el citoplasma de las células. La vía de las JAK cinasas es utilizada por receptores de citocinas proinflamatorias iniciando la cascada de señalización intracelular que regula la transcripción genética de la respuesta inmunitaria e inflamatoria. |
| --- | --- |
| ¿En qué línea de tratamiento estaría indicado? | Es eficaz en pacientes con AR activa que han fallado cuando menos a un FARME. **[NE: 1, GR: A]**49  Sin embargo, este grupo de expertos recomienda que es una alternativa en pacientes con AR activa que han fallado a cuando menos un FMDE biológico.es recomendar su uso a partir de la falla al primer biológico por la limitada experiencia (hasta la fecha) en cuanto a seguridad a largo plazo. **[GR: D]**  Barrera de implementación: Debe mencionarse que los datos de seguimiento a largo plazo son limitados, se prevé un costo alto (similar al de los anti TNF) y como con otros FARME, hay mayor riesgo de infecciones. |
| ¿Qué estudios se requieren antes del tratamiento y durante el seguimiento? | El perfil de seguridad es similar a lo descrito para otros FARME. Se recomienda realizar vigilancia especial sobre infecciones y neoplasias (especialmente hematológicas). Se ha demostrado mayor incidencia de tuberculosis en países endémicos, por lo que debe descartarse Tb latente o activa antes de su inicio. Se aplicarán las mismas recomendaciones que para el uso de anti TNF. Los estudios no han incluido pacientes con infección por virus de hepatitis B, C o HIV, por lo que se recomienda escrutinio previo a su inicio. **[NE: 1, GR: A]**50  Este fármaco debe clasificarse como B o C, ya que no hay estudios que documenten su riesgo durante el embarazo y la lactancia. No se recomienda su uso durante la lactancia.  Durante el seguimiento se recomiendan: BH, PFH , perfil de lípidos y evaluación de la función renal. Basados en los estudios fase III, se sugiere una periodicidad de realización de estudios de seguridad inicialmente cada mes y posteriormente cada 2 a 3 meses. **[NE: 2, GR: B]**49 |
| ¿Cuál es la mejor combinación y secuencia? | Tofacitinib como monoterapia dos veces al día ha demostrado beneficio clínico a las dosis propuestas para su aprobación (5 y 10 mg). **[NE: 1, GR: A]**49  Tofacitinib combinado con MTX ha demostrado beneficio clínico en los pacientes con AR a las dosis propuestas para su aprobación. **[NE: 1, GR: A]**49  Tofacitinib ha sido combinado con otros FARME no biológicos (a excepción de azatioprina y ciclosporina A) con perfil de beneficio/seguridad similar al previo. **[NE: 1, GR: A]**51 |
| ¿Cuál es el tiempo para definir ajuste de dosis y retiro del medicamento? | Se desconoce el tiempo mínimo de tratamiento, sin embargo, se ha observado respuesta clínica desde la segunda semana de inicio del medicamento. **[NE: 1, GR: A]**50  Con base en la duración mínima de los estudios aleatorizados y controlados y con el tiempo en el cual se plantean las estrategias de “escape” cuando no hay una respuesta adecuada, el grupo de expertos sugiere considerar falla a tofacitinib si no hay una adecuada respuesta clínica entre las 12 a 20 semanas de tratamiento. **[GR: D]** |
| ¿Cuáles son las dosis mínima y máxima recomendadas? | En EUA la FDA ha aprobado la dosis de 5 mg cada 12 horas. En México la COPEPRIS aprobó recientemente la dosis de 5 mg cada doce horas (julio 2013). **[NE: 1, GR: A]**52 |
| Contraindicaciones | Los estudios aleatorizados han excluido su uso en las siguientes entidades: infecciones graves (al momento del tratamiento o antecedente reciente), historia de malignidad, alteraciones hematológicas (leucopenia menor a 3,000/mm³, neutropenia menor a 1,200/mm³, anemia menor a 9 g/dL, trombocitopenia menor a 100,000/mm³ y linfopenia menor a 500/mm), alteraciones hepáticas (elevación de transaminasas y de bilirrubinas), depuración de creatinina menor a 40 mL/min], embarazo, lactancia, infección por virus de hepatitis B, C o VIH, historia de comorbilidad clínicamente importante y no controlada, historia de prótesis articular infectada, historia de herpes simple o zoster diseminado, antecedente reciente de aplicación de vacunas con virus vivos o atenuados, trauma grave o cirugía mayor reciente.49-52  Recientemente, los estudios de seguimiento a largo plazo con tofacitinib han alertado sobre la presencia de complicaciones graves (como infecciones oportunistas) y de difícil manejo como son ciertos tumores, hepatotoxicidad, perforación gastrointestinal e infecciones. Por lo anterior, la agencia europea regulatoria de medicamentos (EMA) ha denegado la aprobación para la comercialización de tofacitinib en Europa y la FDA (Food and Druf Administration) ha emitido una alerta internacional si bien recomienda que los pacientes actualmente involucrados en los estudios a largo plazo, pueden seguir recibiendo el medicamento.53,54 |

**Referencias:**

1. National Collaborating Centre for Chronic Conditions. Rheumatoid arthritis: national clinical guideline for management and treatment in adults. London: Royal College of Physicians, February 2009.
2. Agency for Healthcare Research and Quality. National Guideline Clearinghouse. Guideline Summary NGC-9044. Update of the clinical practice guidelines for the management of rheumatoid arthritis in Spain. Spanish Society of Rheumatology: 2011.
3. Scottish Intercollegiate Guidelines Network (SIGN). Management of early rheumatoid arthritis. Edinburgh: SIGN; 2011.
4. Henrique da Mota LM, Afonso Cruz B, Viegas Brenol C, Alves Pereira I, Rezende-Fronza LS, Barros Bertolo M, et al. 2012 Brazilian Society of Rheumatology Consensus for the treatment of rheumatoid arthritis. *Rev Bras Reumatol* 2012; 52 (2): 135-74.
5. Marks JL, Colebatch AN, Buchbinder R, Edwards CJ. Pain management for rheumatoid arthritis and cardiovascular or renal comorbidity. *Cochrane Database of Systematic Reviews* 2011, Issue 10. Art. No.: CD008952. DOI: 10.1002/14651858.CD008952.pub2
6. Bykerk VP, Akhavan P, Hazlewood GS, Schieir O, Dooley A, Haraoui B, et al. Canadian Rheumatology Association Recommendations for Pharmacological Management of Rheumatoid Arthritis with Traditional and Biological Disease-modifying Antirheumatic Drugs. *J Rheumatol* 2012; 39: 1559-1582.
7. Roux CH, Breuil V, Valerio L, Amoretti N, Brocq O, Albert C, Grisot C, Allam Y, Chevalier P, Pradier C, Euller-Ziegler L. Etanercept compared to intraarticular corticoesteroid injection in rheumatoid arthritis: double-blind, randomized pilot study. *J Rheumatol* 2011; 38: 1009-11.
8. Den Uyl D, van Raalte DH, Nurmohamed MT, Lems WF, Bijlsma JWJ, Hoes JN, Dijkmans BAC, Diamant M. Metabolic effects of high-dose prednisolone treatment in early rheumatoid arthritis. *Arthritis & Rheumatism* 2012; 64 (3): 639-646.
9. Davis III JM, Matteson EL. My treatment approach to rheumatoid arthritis. *Mayo Clin Proc* 2012; 87(7): 659-673.
10. Smolen JS, Landewe R, Breedveld FC, Dougados M, Emery P, Gaujoux-Viala C, *et al*. EULAR recommendations for the management of rheumatoid arthritis with synthetic and biological disease-modifying antirheumatic drugs. *Ann Rheum Dis* 2010;69:964-75.
11. Salliot C, van der Heijde D. Long-term safety of methotrexate monotherapy in patients with rheumatoid arthritis: a systematic literature research. *Ann Rheum Dis* 2009;68:1100-4.
12. Katchamart W, Trudeau J, Phumethum V, Bombardier C. Methotrexate monotherapy versus methotrexate combination therapy with non-biologic disease modifying anti-rheumatic drugs for rheumatoid arthritis*. Cochrane Database Syst Rev* 2010.
13. Bombardier C, Hazlewood GS, Akhavan P, *et al*. Canadian Rheumatology Association recommendations or the pharmacological management of rheumatoid arthritis with traditional and biologic disease-modifying antirheumatic drugs: Part II. Safety. *J Rheumatol* 2012;39(8):1383-1602.
14. GUIPCAR group. Updte of the clinical practice guideline for the management of rheumatoid arthritis in Spain. Spanish Society of Rheumatology. AHRQ National Guideline Clearinghouse. Guideline summary NCG-9044, 2011:367.
15. Marmor MF, Kellner U, Lai TY, lyons JS, Mieler WF. Revised recommendations on screening for cloroquine and hydroxicloroquine retinopaty. *Ophtalm* 2011:118(2):415-422.
16. Rozman B. Clinical pharmacokinetics of leflunomide. *Clin Pharmacokinet* 2002;41(6):421-30.
17. Osiri M, Shea B, Robinson V, *et al*. Leflunomide for the treatment of rheumatoid arthritis: a systematic review and metaanalysis. *J Rheumatol*  2003;30(6):1182-1190.
18. Kremer JM, Genovese MC, Cannon GW, *et al*. Concomitant leflunomide therapy in patients with active rheumatoid arthritis despite stable doses of methotrexate. A randomized, double-blind, placebo-controlled trial. *Ann Intern Med* 2002;137(9):726-733.
19. Visser K, Katchamart W, Loza E, *et al.* Multinational evidence-based recommendations for the use of methotrexate in rheumatic disorders with a focus on rheumatoid arthritis: integrating systematic literature research and expert opinion of a broad international panel of rheumatologists in the 3E Initiative. *Ann Rheum Dis* 2009;68:1086-93.
20. Saag KG, Teng GG, Patkar NM, Anuntiyo J, Finney C, Curtis JR, *et al*. American College of Rheumatology 2008 recommendations for the use of nonbiologic and biologic disease-modifying antirheumatic drugs in rheumatoid arthritis. *Arthritis Care Res* 2008;59:762-84.
21. Dendooven A, De Rycke L, Verhelst X, Mielants H, Veys EM, De Keyser F. Leflunomide and methotrexate combination therapy in daily clinical practice. *Ann Rheum Dis* 2006 Jun;65(6):833-4.
22. Brent RL. Teratogen update: reproductive risks of leflunomide (Arava); a pyrimidine synthesis inhibitor: counseling women taking leflunomide before or during pregnancy and men taking leflunomide who are contemplating fathering a child. *Teratology* 2001;63(2):106-112.
23. Fuerst M, Möhl H, Baumgärtel K, *et al*. Leflunomide increases the risk of early healing complications in patients with rheumatoid arthritis undergoing selective orthopedic surgery. *Rheumatol Int* 2006;26(12):1138-1142.
24. Pieringer H, Stuby U, Biesenbach G. Patients with rheumatoid arthritis undergoing surgery: how should we deal with antirheumatic treatment? *Semin Arthritis Rheum* 2007;36(5):278-286.
25. Gaffney K, Scott DG. Azathioprine and cyclophosphamide in the treatment of rheumatoid arthritis. *Br J Rheumatol* 1998;37(8):824-36.
26. Suarez-Almazor ME, Belseck E, Shea B, *et al*. Cyclophosphamide for rheumatoid arthritis. *Cochrane Database Syst* Rev 2000;(2):CD001157.
27. Jain V, Gordon C. Managing pregnancy in inflammatory rheumatological diseases. *Arthritis Res Ther* 2011;13(1):206.
28. Munro R, Capell HA. Penicillamine. *Br J Rheumatol* 1997;36(1):104-9.
29. Suarez-Almazor ME, Spooner C, Belseck E. Penicillamine for treating rheumatoid arthritis. *Cochrane Database Syst Rev* 2000;(4):CD001460
30. Adalimumab, Etanercept, Infliximab, Rituximab and Abatacept for the treatment of rheumatoid arthritis after the failure of a TNF inhibitor, part review of NICE technology appraisal guidance 195. August 2010.
31. Joao Eurico Fonseca, Miguel Bernardes, Helena Canhao. Portuguese guidelines for the use of biological agents in RA. *Acta Reumatol Port* 2011;36:385-388.
32. Strand V, Smolen JS, van Vollenhoven RF, *et al*. Certolizumab pegol plus methotrexate provides broad relief from the burden of rheumatoid arthritis: analysis of patient-reported outcomes from the RAPID 2 trial. *Ann Rheum Dis* 2011;70:996-1002.
33. Weinblatt ME, Fleischmann R, Huizinga TW, *et al*. Efficacy and safety of certolizumab pegol in a broad population of patients with active rheumatoid arthritis: results from the REALISTIC phase IIIb study. *Rheumatology* (Oxford) 2012.
34. Curtis JR, Luijtens K, Kavanaugh A. Predicting future response to certolizumab pegol in rheumatoid arthritis patients: features at 12 weeks associated with low disease activity at 1 year. *Arthritis Care Res* (Hoboken). 2012;64:658-667.
35. Emery P, Fleischmann R, van der Heijde D, *et al*. The effects of golimumab on radiographic progression in rheumatoid arthritis: results of randomized controlled studies of golimumab before methotrexate therapy and golimumab after methotrexate therapy. *Arthritis Rheum* 2011;63:1200-1210.
36. Smolen JS, Kay J, Doyle MK, *et al*. Golimumab in patients with active rheumatoid arthritis after treatment with tumour necrosis factor alpha inhibitors (GO-AFTER study): a multicentre, randomised, double-blind, placebo-controlled, phase III trial. *Lancet* 2009;374:210-221.
37. Kremer J, Ritchlin C, Mendelsohn A, *et al*. Golimumab, a new human anti-tumor necrosis factor alpha antibody, administered intravenously in patients with active rheumatoid arthritis: Forty-eight-week efficacy and safety results of a phase III randomized, double-blind, placebo-controlled study. *Arthritis Rheum* 2010;62:917-928.
38. Taylor PC, Ritchlin C, Mendelsohn A, *et al*. Maintenance of efficacy and safety with subcutaneous golimumab among patients with active rheumatoid arthritis who previously received intravenous golimumab. *J Rheumatol* 2011;38:2572-2580.
39. Favalli EG, Caporali R, Sinigaglia L, Pipitone N, Miniati I, Montecucco C, *et al*. Recommendations for the use of biologic therapy in rheumatoid arthritis: update fron the Italian Society for Rheumatology II. Safety. *Clin Exp Rheumatol* 2011;29(Suppl 66):S15-27.
40. Bukhari M, Abernethy R, Deighton C, Ding T, Hyrich K, Luna M, *et al*. BSR and BHPR guidelines on the use of rituximab in rheumatoid arthritis. *Rheumatology* 2011;50:2311-3.
41. Martín-Mola E, Hernández B, García-Arias M, Álvaro-Gracia JM, Balsa A, Gómez Reino J, *et al*. Consenso de uso de rituximab en artritis reumatoide. Un documento con recomendaciones basadas en la evidencia. *Reumatol Clin* 2011;7:30-44.
42. Singh JA, Furst DE, Bharat A, Curtis JR, Kavanaugh AF, Kremer JM, *et al*. 2012 update of the 2008 American College of Rheumatology recommendations for the use of disease-modifying antirheumatic drugs and biologic agents in the treatment of rheumatoid arthritis. *Arthritis Care Res* (Hoboken) 2012;64:625-39. doi: 10.1002/acr.21641.
43. Tocilizumab for the treatment of rheumatoid arthritis (rapid review of technology appraisal guidance 198). NICE technology appraisal guidance 247. Guidance.nice.org.uk/ta247. February 2012.
44. Smolen JS, Schoels MM, Nishimoto N, Breedveld FC, Burmester GR, Dougados M, *et al*. Consensus statement on blocking the effects of interleukin-6 in particular by interleukin-6 receptor inhibition in rheumatoid arthritis and other inflammatory conditions. *Ann Rheum Dis* 2012. [Epub ahead of print].
45. Tocilizumab Summary of product characteristics. <http://www.ema.europa.eu/docs/en_GB/document_library/EPAR_-_Product_Information/human/000955/WC500054890.pdf>
46. Westhovens R, Robles M, Ximenes AL, Nayiager S, Wollenhaupt J, Durez P, *et al*. Clinical efficacy and safety of abatacept in methotrexate-naïve patients with early rheumatoid arthritis and poor prognostic factors. *Ann Rheum Dis* 2009;68:1870-7.
47. Wells AF, Westhovens R, Reed DM, Fanti L, Becker J-D, Covucci A, *et al*. Abatacept plus methotrexate provides incremental clinical benefits versus methotrexate alone in methotrexate.naive patients with early rheumatoid arthritis who achieve radiographic nonprogression. *J Rheumatol* 2011;38:2362-8.
48. Kaine J, Gladstein G, Strusberg I, Robles M, Louw I, Gujrathi S, *et al*. Evaluation of abatacept administered subcutaneously in adults with active rheumatoid arthritis: impact of withdrawal and reintroduction on immunogenicity, efficacy and safety (Phase IIIb ALLOW study). *Ann Rheum Dis* 2012;71:38-44. Epub 2011 Sep 13.
49. Fleischmann R, Cutolo M, Genovese MC. PhaseIIb dose-ranging study of the oral JAK inhibitor tofacitinib (CP-690,550) or adalimumabmonotherapy versus placebo in patients with active rheumatoid arthritis with an inadequate response to disease-modifying antirheumaticdrugs. *Arthritis Rheum* 2012 Mar;64(3):617-29.
50. Kremer JM, Bloom BJ, Breedveld FC.The safety and efficacy of a JAK inhibitor in patients with active rheumatoid arthritis: Results of a double-blind, placebo-controlled phase IIa trial of three dosage levels of CP-690,550 versus placebo. *Arthritis Rheum* 2009;60 (7):1895-905.
51. Kremer J, Li Z, Hall S. Tofacitinib (CP-690, 550), an oral JAK inhibitor, in combination with traditional DMARDs: phase 3 study in patients with active rheumatoid arthritis with inadequate response to DMARDs. *Ann Rheum Dis* 2011; 70:611.
52. Kremer JM, Cohen S, Wikinson BE. A phase IIb dose-ranging study of the oral JAK inhibitor tofacitinib (CP-690,550) versus placebo in combination with background methotrexate in patients with active rheumatoid arthritis and an inadequate response to methotrexate alone. *Arthritis Rheumat* 2012;64(4):970-981.
53. REMS. NDA 203,214 XELJANZ (TOFACITINIB). Risk evaluation and mitigation strategy 2012.
54. European Medicines Agency. Science medicines health. 26 July 2013. Refusal of the marketing authorisation fo Xeljanz (tofacitinib). Outcome of re-examination.
